# Supplementary material for: The full genome sequences of 8 equine herpesvirus type 4 isolates from horses in Japan
Source: PubMed Central journal article supplement — J Vet Med Sci. 2016 Nov 14;79(1):206–12. doi: 10.1292/jvms.16-0506 (PMC5289262; doi:10.1292/jvms.16-0506), 2016-11-14
Supplement: jvms-79-206-s001.pdf [file jvms-79-206-s001.pdf]

Supplementary table 1. Differences of amino acid sequence compared with the reference strain NS80567.

| Gene      | AA Change     | CDS AA no.   | TH20p   | 83-MB   | 91c1  | 01-10-1 | 03-VR | 05-1-202 | 11-10 | 12-1-203 | 405-76 | RT4-70 | R19-68 | 1532-99 | 1546-99 | ER39-67 | 475-78 | 3056-07 | 2387-75 | 960-80 | 3408-77 | 3407-77 | 157-69 | 308-74 |       |
|-----------|---------------|--------------|---------|---------|-------|---------|-------|----------|-------|----------|--------|--------|--------|---------|---------|---------|--------|---------|---------|--------|---------|---------|--------|--------|-------|
| ORF1      | V>L           | 21           |         |         | V79I  |         |       |          |       |          |        |        |        |         |         |         |        |         |         |        |         |         |        |        |       |
| ORF2      | V>M           | 56           |         |         |       |         | V56M  |          |       | V21L     |        |        |        |         |         |         |        |         |         |        |         |         |        |        |       |
|           | S>P           | 83           |         |         | S83P  |         |       |          |       |          |        |        |        |         |         |         |        |         |         |        |         |         |        |        |       |
|           | R>H           | 155          |         |         |       |         |       |          |       |          |        |        | R155H  |         |         |         |        |         |         |        |         |         |        |        |       |
|           | D>E           | 112          |         |         |       |         |       |          |       |          |        |        |        |         |         |         |        |         |         |        |         |         |        |        |       |
| ORF3      | N>H           | 198          |         |         |       |         |       |          |       | N198H    |        |        |        |         |         |         |        |         |         |        |         |         |        |        |       |
|           | S>F           | 213          |         |         |       |         |       |          |       | S213F    |        |        |        |         |         |         |        |         |         |        |         |         |        |        |       |
|           | G>S           | 229          |         |         |       |         |       |          |       |          |        |        |        |         |         |         |        |         |         |        |         |         |        |        |       |
|           | S>L           | 30           |         |         |       |         |       |          |       |          |        |        |        |         |         |         |        |         |         |        |         |         |        |        |       |
| ORF5      | P>H           | 79           |         |         |       | P79H    |       |          |       |          |        |        |        |         |         |         |        |         |         |        |         |         |        |        |       |
|           | A>T           | 402          | A402T   | A402T   |       |         |       |          |       |          | A402T  | A402T  | A402T  | A402T   | A402T   | A402T   | A402T  | A402T   | A402T   |        | P79H    | P79H    |        |        |       |
|           | K>N           | 439          | K439N   | K439N   |       |         |       |          |       |          | K439N  | K439N  | K439N  | K439N   | K439N   | K439N   | K439N  | K439N   | K439N   |        |         |         |        |        | K439N |
|           | E>K           | 104          |         |         |       |         |       |          |       |          |        |        |        |         |         |         |        |         |         |        |         |         |        |        |       |
| ORF7      | T>P           | 486          | T486P   | T486P   |       |         |       |          |       |          |        |        |        |         |         |         |        |         |         |        |         |         |        |        |       |
|           | P>L           | 527          |         |         |       |         |       |          |       |          |        |        |        |         |         |         |        |         |         |        |         |         |        |        |       |
|           | D>N           | 614          | D614N   | D614N   |       |         |       |          |       |          |        |        |        |         |         |         |        |         |         |        |         |         |        |        |       |
|           | Q>R           | 791          |         |         |       |         |       |          |       |          |        |        |        |         |         |         |        |         |         |        |         |         |        |        |       |
| ORF9      | V>A           | 4            |         |         |       |         |       |          |       |          |        |        |        |         |         |         |        |         |         |        |         |         |        |        |       |
|           | G>W           | 158          |         |         |       |         |       |          |       |          |        |        |        |         |         |         |        |         |         |        |         |         |        |        |       |
|           | Y>S           | 205          | Y205S   | Y205S   | Y205S | Y205S   | Y205S | Y205S    | Y205S | Y205S    | Y205S  | Y205S  | Y205S  | Y205S   | Y205S   | Y205S   | Y205S  | Y205S   | Y205S   | Y205S  | Y205S   | Y205S   | Y205S  | Y205S  | Y205S |
|           | N>D           | 280          | N280D   | N280D   |       |         |       |          |       |          |        |        |        |         |         |         |        |         |         |        |         |         |        |        |       |
| ORF10     | T>A           | 8            |         |         |       |         |       |          |       |          |        |        |        |         |         |         |        |         |         |        |         |         |        |        |       |
|           | M>I           | 95           | M95I    |         |       |         |       |          |       |          |        |        |        |         |         |         |        |         |         |        |         |         |        |        |       |
| ORF12     | D>Y           | 7            |         |         |       |         |       |          |       |          |        |        |        |         |         |         |        |         |         |        |         |         |        |        |       |
| ORF13     | G>R           | 31           |         |         |       |         |       |          |       |          |        |        |        |         |         |         |        |         |         |        |         |         |        |        |       |
|           | E>D           | 152          |         |         |       |         |       |          |       |          |        |        |        |         |         |         |        |         |         |        |         |         |        |        |       |
|           | G>E           | 350          |         |         |       |         |       |          |       |          |        |        |        |         |         |         |        |         |         |        |         |         |        |        |       |
|           | R>Q           | 489          |         |         |       |         |       |          |       |          |        |        |        |         |         |         |        |         |         |        |         |         |        |        |       |
|           | V>A           | 610          |         |         |       |         |       |          |       |          |        |        |        |         |         |         |        |         |         |        |         |         |        |        |       |
| ORF14     | L>I           | 26           | L26I    |         |       |         |       |          |       |          |        |        |        |         |         |         |        |         |         |        |         |         |        |        |       |
|           | G>A           | 134          | G134A   | G134A   | G134A | G134A   | G134A | G134A    | G134A | G134A    | G134A  | G134A  | G134A  | G134A   | G134A   | G134A   | G134A  | G134A   | G134A   | G134A  | G134A   | G134A   | G134A  | G134A  | G134A |
|           | M>I           | 477          | M477I   | M477I   |       |         |       |          |       |          |        |        |        |         |         |         |        |         |         |        |         |         |        |        |       |
|           | H>R           | 504          | H504R   | H504R   | H504R | H504R   | H504R | H504R    | H504R | H504R    | H504R  | H504R  | H504R  | H504R   | H504R   | H504R   | H504R  | H504R   | H504R   | H504R  | H504R   | H504R   | H504R  | H504R  | H504R |
|           | E>K           | 731          |         |         |       |         |       |          |       |          |        |        |        |         |         |         |        |         |         |        |         |         |        |        |       |
| ORF15     | D>N           | 24           |         |         |       |         |       |          |       |          |        |        |        |         |         |         |        |         |         |        |         |         |        |        |       |
|           | I>T           | 162          | I162T   | I162T   |       |         |       |          |       |          |        |        |        |         |         |         |        |         |         |        |         |         |        |        |       |
|           | S>G           | 194          | S194G   | S194G   | S194G | S194G   | S194G | S194G    | S194G | S194G    | S194G  | S194G  | S194G  | S194G   | S194G   | S194G   | S194G  | S194G   | S194G   | S194G  | S194G   | S194G   | S194G  | S194G  | S194G |
| ORF16     | NAKEVD>K-RDRG | 274          |         |         |       |         |       |          |       |          |        |        |        |         |         |         |        |         |         |        |         |         |        |        |       |
|           | E>D           | 277          |         |         |       |         |       |          |       |          |        |        |        |         |         |         |        |         |         |        |         |         |        |        |       |
|           | D>E           | 309          | D309E   | D309E   |       |         |       |          |       |          |        |        |        |         |         |         |        |         |         |        |         |         |        |        |       |
|           | S>G           | 448          |         |         |       |         |       |          |       |          |        |        |        |         |         |         |        |         |         |        |         |         |        |        |       |
|           | V>M           | 478          |         |         |       |         |       |          |       |          |        |        |        |         |         |         |        |         |         |        |         |         |        |        |       |
| ORF17     | H>Y           | 86           |         |         |       |         |       |          |       |          |        |        |        |         |         |         |        |         |         |        |         |         |        |        |       |
| ORF18     | S>L           | 169          |         |         |       |         |       |          |       |          |        |        |        |         |         |         |        |         |         |        |         |         |        |        |       |
|           | Q>H           | 225          |         |         |       |         |       |          |       |          |        |        |        |         |         |         |        |         |         |        |         |         |        |        |       |
|           | D>N           | 366          |         |         |       |         |       |          |       |          |        |        |        |         |         |         |        |         |         |        |         |         |        |        |       |
| ORF19     | T>A           | 139          | T139A   |         |       |         |       |          |       |          |        |        |        |         |         |         |        |         |         |        |         |         |        |        |       |
|           | T>A           | 260          |         |         |       |         |       |          |       |          |        |        |        |         |         |         |        |         |         |        |         |         |        |        |       |
|           | P>H           | 309          |         |         |       |         |       |          |       |          |        |        |        |         |         |         |        |         |         |        |         |         |        |        |       |
|           | S>A           | 346          | S346A   | S346A   |       |         |       |          |       |          |        |        |        |         |         |         |        |         |         |        |         |         |        |        |       |
|           | R>H           | 355          |         |         |       |         |       |          |       |          |        |        |        |         |         |         |        |         |         |        |         |         |        |        |       |
| ORF20     | N>K           | 5            |         |         |       |         |       |          |       |          |        |        |        |         |         |         |        |         |         |        |         |         |        |        |       |
|           | L>S           | 15           | L15S    | L15S    |       |         |       |          |       |          |        |        |        |         |         |         |        |         |         |        |         |         |        |        |       |
|           | A>S           | 75           |         |         |       |         |       |          |       |          |        |        |        |         |         |         |        |         |         |        |         |         |        |        |       |
|           | T>S           | 253          | T253S   | T253S   | T253S | T253S   | T253S | T253S    | T253S | T253S    | T253S  | T253S  | T253S  | T253S   | T253S   | T253S   | T253S  | T253S   | T253S   | T253S  | T253S   | T253S   | T253S  | T253S  | T253S |
| ORF21     | T>I           | 24           |         |         |       |         |       |          |       |          |        |        |        |         |         |         |        |         |         |        |         |         |        |        |       |
| M>I       | 354           |              |         |         |       |         |       |          |       |          |        |        |        |         |         |         |        |         |         |        |         |         |        |        |       |
| ORF22     | A>V           | 416          | A416V   |         |       |         |       |          |       |          |        |        |        |         |         |         |        |         |         |        |         |         |        |        |       |
| ORF23     | A>T           | 206          | A206T   | A206T   |       |         |       |          |       |          |        |        |        |         |         |         |        |         |         |        |         |         |        |        |       |
|           | I>M           | 217          | IA217MT | IA217MT |       |         |       |          |       |          |        |        |        |         |         |         |        |         |         |        |         |         |        |        |       |
|           | P>S           | 550          |         |         |       |         |       |          |       |          |        |        |        |         |         |         |        |         |         |        |         |         |        |        |       |
|           | T>A           | 647          | T647A   |         |       |         |       |          |       |          |        |        |        |         |         |         |        |         |         |        |         |         |        |        |       |
|           | A>S           | 776          |         |         |       |         |       |          |       |          |        |        |        |         |         |         |        |         |         |        |         |         |        |        |       |
| ORF24     | A>T           | 95           |         |         |       |         |       |          |       |          |        |        |        |         |         |         |        |         |         |        |         |         |        |        |       |
|           | V>A           | 140          |         |         |       |         |       |          |       |          |        |        |        |         |         |         |        |         |         |        |         |         |        |        |       |
|           | E>V           | 180          |         |         |       |         |       |          |       |          |        |        |        |         |         |         |        |         |         |        |         |         |        |        |       |
|           | G>E           | 197          |         |         |       |         |       |          |       |          |        |        |        |         |         |         |        |         |         |        |         |         |        |        |       |
|           | E>G           | 258          | E258G   | E258G   | E258G | E258G   | E258G | E258G    | E258G | E258G    | E258G  | E258G  | E258G  | E258G   | E258G   | E258G   | E258G  | E258G   | E258G   | E258G  | E258G   | E258G   | E258G  | E258G  | E258G |
|           | I>V           | 265          |         |         |       |         |       |          |       |          |        |        |        |         |         |         |        |         |         |        |         |         |        |        |       |
|           | S>G           | 365          | S365G   | S365G   | S365G | S365G   | S365G | S365G    | S365G | S365G    | S365G  | S365G  | S365G  | S365G   | S365G   | S365G   | S365G  | S365G   | S365G   | S365G  | S365G   | S365G   | S365G  | S365G  | S365G |
|           | D>Y           | 402          |         |         |       |         |       |          |       |          |        |        |        |         |         |         |        |         |         |        |         |         |        |        |       |
|           | A>T           | 501          |         |         |       |         |       |          |       |          |        |        |        |         |         |         |        |         |         |        |         |         |        |        |       |
|           | P>S           | 508          |         |         |       |         |       |          |       |          |        |        |        |         |         |         |        |         |         |        |         |         |        |        |       |
|           | C>G           | 595          | C595G   | C595G   | C595G | C595G   | C595G | C595G    | C595G | C595G    | C595G  | C595G  | C595G  | C595G   | C595G   | C595G   | C595G  | C595G   | C595G   | C595G  | C595G   | C595G   | C595G  | C595G  | C595G |
|           | M>L           | 1236         |         |         |       |         |       |          |       |          |        |        |        |         |         |         |        |         |         |        |         |         |        |        |       |
| PSTE>ALNR | 1513          | PSTE1513ALNR |         |         |       |         |       |          |       |          |        |        |        |         |         |         |        |         |         |        |         |         |        |        |       |





| Gene  | AA Change | CDS AA no. | TH20p | 83-MB | 91c1  | 01-10-1 | 03-VR | 05-1-202 | 11-10 | 12-1-203 | 405-76 | R14-70 | R19-68 | 1532-99 | 1546-99 | EP39-67 | 475-78 | 3056-07 | 2387-75 | 960-90 | 3409-77 | 3407-77 | 157-69 | 306-74 |       |       |       |
|-------|-----------|------------|-------|-------|-------|---------|-------|----------|-------|----------|--------|--------|--------|---------|---------|---------|--------|---------|---------|--------|---------|---------|--------|--------|-------|-------|-------|
| ORF67 | G > S     | 50         | G50S  | G50S  |       |         |       | G50S     |       |          |        | G50S   | G50S   | G50S    | G50S    | G50S    | G50S   | G50S    |         |        |         |         |        |        |       |       |       |
|       | Y > C     | 170        |       |       |       |         |       |          |       |          |        |        |        |         |         |         |        |         |         |        |         | Y170C   | Y170C  |        |       |       |       |
| ORF68 | I > T     | 118        | I118T | I118T |       |         |       | I118T    |       |          |        | I118T  | I118T  | I118T   | I118T   | I118T   | I118T  | I118T   |         |        |         |         |        |        |       |       |       |
| ORF69 | S > A     | 281        |       |       |       |         |       |          | S281A | S281A    |        |        |        |         |         |         |        |         |         |        |         |         |        |        |       |       |       |
| ORF70 | T > A     | 342        |       |       |       |         | T342A |          |       |          |        |        |        |         |         |         |        |         |         |        |         |         |        |        |       |       |       |
|       | E > G     | 343        |       |       |       |         |       |          |       |          |        |        |        |         |         |         |        |         |         |        |         |         |        |        | E349G |       |       |
|       | G > S     | 344        |       |       |       |         |       |          |       |          |        |        |        |         |         |         |        |         |         |        |         |         |        |        | G344S |       |       |
|       | V > I     | 350        | V350I | V350I |       |         |       | V350I    | V350I | V350I    | V350I  | V350I  | V350I  | V350I   | V350I   | V350I   | V350I  | V350I   | V350I   | V350I  | V350I   | V350I   | V350I  | V350I  | V350I | V350I |       |
|       | - > G     | 354        | -354G | -354G |       | -354G   |       | -354G    | -354G | -354G    | -354G  | -354G  | -354G  | -354G   | -354G   | -354G   | -354G  | -354G   | -354G   | -354G  | -354G   | -354G   | -354G  | -354G  | -354G | -354G |       |
| ORF71 | T > S     | 132        | T132S | T132S |       |         |       | T132S    |       |          |        | D153E  | D153E  | D153E   | D153E   | D153E   | D153E  | D153E   | D153E   | D153E  | D153E   | D153E   | D153E  | D153E  | D153E | D153E |       |
|       | D > E     | 153        | D153E | D153E |       |         |       | D153A    |       |          |        | D153E  | D153E  | D153E   | D153E   | D153E   | D153E  | D153E   | D153E   | D153E  | D153E   | D153E   | D153E  | D153E  | D153E | D153E |       |
|       | D > A     | 153        |       |       |       |         |       | D153A    |       |          |        |        |        |         |         |         |        |         |         |        |         |         |        |        |       |       |       |
|       | L > S     | 228        | L228S | L228S | L228S | L228S   | L228S | L228S    | L228S | L228S    | L228S  | L228S  | L228S  | L228S   | L228S   | L228S   | L228S  | L228S   | L228S   | L228S  | L228S   | L228S   | L228S  | L228S  | L228S | L228S |       |
|       | K > R     | 315        | K315R | K315R |       |         |       | K315R    | K315R | K315R    | K315R  | K315R  | K315R  | K315R   | K315R   | K315R   | K315R  | K315R   | K315R   | K315R  | K315R   | K315R   | K315R  | K315R  | K315R | K315R | K315R |
|       | R > Q     | 326        |       |       |       | R326Q   |       |          |       |          |        |        |        |         |         |         |        |         |         |        |         |         |        |        |       |       |       |
|       | Q > R     | 361        | Q361R | Q361R |       |         |       | Q361R    | Q361R | Q361R    | Q361R  | Q361R  | Q361R  | Q361R   | Q361R   | Q361R   | Q361R  | Q361R   | Q361R   | Q361R  | Q361R   | Q361R   | Q361R  | Q361R  | Q361R | Q361R | Q361R |
|       | A > V     | 441        |       |       |       | A441V   |       |          |       |          |        |        |        |         |         |         |        |         |         |        |         |         |        |        |       |       |       |
| ORF72 | L > V     | 27         | L27V  | L27V  |       |         |       | L27V     |       |          |        | L27V   | L27V   | L27V    | L27V    | L27V    | L27V   | L27V    | L27V    | L27V   | L27V    | L27V    | L27V   | L27V   | L27V  |       |       |
|       | G > E     | 193        |       |       |       |         |       | G193E    |       |          |        | G193E  | G193E  | G193E   | G193E   | G193E   | G193E  | G193E   | G193E   | G193E  | G193E   | G193E   | G193E  | G193E  | G193E |       |       |
|       | G > E     | 382        | G382E | G382E | G382E | G382E   | G382E | G382E    | G382E | G382E    | G382E  | G382E  | G382E  | G382E   | G382E   | G382E   | G382E  | G382E   | G382E   | G382E  | G382E   | G382E   | G382E  | G382E  | G382E | G382E |       |
| ORF73 | L > I     | 58         |       |       |       |         |       |          |       |          |        | L58I   |        |         |         |         |        |         |         |        |         |         |        |        |       |       |       |
|       | R > W     | 134        | R134W | R134W |       |         |       | R134W    |       |          |        | R134W  | R134W  | R134W   | R134W   | R134W   | R134W  | R134W   | R134W   | R134W  | R134W   | R134W   | R134W  | R134W  | R134W | R134W |       |
|       | F > L     | 186        |       |       |       | F186L   |       |          | F186L | F186L    |        |        |        |         |         |         |        |         |         |        |         |         |        |        |       |       |       |
|       | A > T     | 229        |       |       |       |         |       | A229T    |       |          |        |        |        |         |         |         |        |         |         |        |         |         |        |        |       |       |       |
|       | D > A     | 298        | D298A | D298A |       |         |       | D298A    |       |          |        | D298A  | D298A  | D298A   | D298A   | D298A   | D298A  | D298A   | D298A   | D298A  | D298A   | D298A   | D298A  | D298A  | D298A | D298A |       |
| ORF74 | A > V     | 334        |       |       |       | A334V   |       |          | A334V | A334V    |        |        |        |         |         |         |        |         |         |        |         |         |        |        |       |       |       |
|       | E > K     | 60         |       |       |       |         |       |          |       |          | E60K   |        |        |         |         |         |        |         |         |        |         |         |        |        |       | E60K  |       |
|       | G > E     | 123        |       |       |       |         | M155I |          |       |          |        |        |        |         |         |         |        |         | G123E   |        |         |         |        |        |       |       |       |
|       | M > I     | 155        |       |       |       |         |       | S330L    |       |          |        |        |        |         |         |         |        |         |         |        | M155I   | M155I   | M155I  |        |       |       |       |
|       | S > L     | 330        |       |       |       |         |       |          |       |          |        |        |        |         | L371P   |         |        |         |         |        |         |         |        |        |       |       |       |
| ORF75 | S > I     | 497        |       |       | S497I |         |       |          | S497I | S497I    |        |        |        |         |         |         |        |         |         |        |         |         |        |        |       |       |       |
|       | E > G     | 58         |       |       |       | E58G    |       |          |       |          |        |        |        |         |         |         |        |         |         | E58G   | E58G    |         |        |        |       |       |       |
| ORF76 | V > A     | 7          |       | V7A   |       |         |       |          |       |          |        |        |        |         |         |         |        |         |         |        |         |         |        |        |       |       |       |
|       | D > E     | 34         |       |       |       |         |       |          | D34E  | D34E     |        |        |        |         |         |         |        |         |         |        |         |         |        |        |       |       |       |
|       | D > G     | 41         | D41G  | D41G  |       |         |       | D41G     |       |          |        | D41G   | D41G   | D41G    | D41G    | D41G    | D41G   | D41G    | D41G    | D41G   | D41G    | D41G    | D41G   | D41G   | D41G  | D41G  |       |
|       | C > R     | 94         |       |       |       | C94R    |       |          |       |          |        |        |        |         |         |         |        |         |         | C94R   | C94R    |         |        |        |       |       |       |
|       | A > V     | 95         |       |       |       |         |       |          |       |          |        |        |        |         |         |         |        |         |         |        |         |         |        |        |       |       |       |
|       | G > S     | 122        |       |       |       |         |       | A95V     | A95V  |          |        |        |        |         |         |         |        |         |         |        |         |         |        |        |       |       |       |
|       | G > S     | 141        |       |       |       |         |       | G122S    | G122S |          |        |        |        |         |         |         |        |         |         |        |         |         |        |        |       |       |       |
|       | T > M     | 194        |       |       |       |         |       |          |       |          |        |        |        |         |         |         |        |         |         |        |         |         |        |        |       | T194M |       |
